# Supplementary material
Source: PubMed Central journal article supplement (PMC4696582)
Supplement: ASN.2015010061_ASN2015010061SupplementaryData.pdf [file ASN.2015010061_ASN2015010061SupplementaryData.pdf]

## **Appendix A – Data sources**

The Danish Cancer Registry has recorded incident cases of cancer on a nationwide basis since 1943 and has been shown to have accurate and almost complete ascertainment of cancer cases. Cancer diagnoses in the Cancer Registry are recorded according to the International Classification of Diseases, version 10 (ICD-10), and the ICD for Oncology (ICD-O-1-3) for topography and morphology codes.

The Danish National Prescription Registry contains data on all prescription drugs dispensed to Danish citizens since 1995. The data include the type of drug, date of dispensing, and quantity. The dosing information and the indication for prescribing are not available. Drugs are categorized according to the Anatomic Therapeutic Chemical (ATC) index, a hierarchical classification system developed by the WHO, and the quantity dispensed for each prescription is given by the number and strength of the pharmaceutical entities (e.g., tablets), as well as the defined daily doses (DDD).

The Danish National Patient Register contains nationwide data on all non-psychiatric hospital admissions since 1977 and both psychiatric and non-psychiatric outpatient contacts since 1995. Discharge/contact diagnoses have been coded according to ICD-8 from 1977 to 1993 and ICD-10 since 1994.

Statistics Denmark hosts registries on education and income. The Population Education Register contains information on nearly all adult Danes and provides the highest completed level of education, defined as that with the longest duration of schooling. The Income Statistics Register contains more than 160 variables describing different aspects of income for all Danish citizens since 1970.

The Danish Civil Registration System contains data on date of death and migration to and from Denmark, which allowed us to extract population controls and to keep track of all subjects during the study period.

## Appendix B – Confounders

### Use of drugs ( $\geq 2$ fillings prior to index date)

| <u>Drug</u>                       | <u>ATC-code</u>  |
|-----------------------------------|------------------|
| Non-aspirin NSAIDs                | M01A excl. M01AX |
| Paracetamol                       | N02BE01          |
| Low-dose aspirin                  | B01AC06; B01AC30 |
| Statins                           | C10AA            |
| Thiazides                         | C03A             |
| Beta-blockers                     | C07              |
| Vascular calcium-channel blockers | C08CA            |
| Inhibitors of the RAS system      | C09              |
| Loop diuretics                    | C03C             |

### Prior diagnoses (either a diagnostic code or a drug marker)

| <u>Disease</u>                | <u>ICD-8 code</u>                                   | <u>ICD-10 code</u>                                               | <u>Drug markers</u>                  |
|-------------------------------|-----------------------------------------------------|------------------------------------------------------------------|--------------------------------------|
| Hypertension                  | 401.99                                              | I10-15                                                           | -                                    |
| Diabetes type 1               | 249                                                 | E10                                                              | -                                    |
| Diabetes type 2               | 250                                                 | E11                                                              | A10B ( $\geq 500$ DDD)               |
| COPD                          | 490.00, 491.00, 491.01, 491.03                      | J42-44                                                           | R03BB ( $\geq 500$ DDD)              |
| Alcohol abuse                 | 291, 303, 577.10, 979, 980                          | F10, G31.2, G62.1, G72.1, I42.6, K29.2, K86.0, R78.0, T51, Z72.1 | N07BB01, N07BB03, N07BB04 (ever use) |
| Moderate-severe renal disease | 403-4, 580-584, 590.09, 593.19, 753.10-753.19, 792* | I12-3, N00-N05, N07, N11, N14, N17-N19                           | -                                    |

### Socioeconomic status (education)

| <u>Educational level</u> | <u>Duration of education</u> |
|--------------------------|------------------------------|
| Basic                    | 10 years                     |
| Short/medium             | 11-13 years                  |
| Long                     | >13 years                    |
| Missing/unknown          | -                            |

## Appendix C – Analysis of lamotrigine and valproate

### Lamotrigine

Association between exposure to lamotrigine and risk of upper urinary tract cancer, specified by exposure pattern within the entire follow-up-period, excluding the last year prior to the index date

| Exposure group                  | Cases | Controls | Adjusted OR <sup>1</sup> | Adjusted OR <sup>2</sup> |
|---------------------------------|-------|----------|--------------------------|--------------------------|
| Non-use                         | 6,441 | 257,525  |                          |                          |
| Ever use                        | 36    | 1,555    | 0.9 (0.7-1.3)            | 0.9 (0.6-1.2)            |
| Long-term use ( $\geq 5$ years) | 6,438 | 257,543  | 0.6 (0.3-1.2)            | 0.7 (0.4-1.3)            |
| Duration of use:                |       |          |                          |                          |
| < 1 year                        | 17    | 706      | 1.0 (0.6-1.6)            | 0.9 (0.5-1.4)            |
| 1-4.99 years                    | 14    | 543      | 1.0 (0.6-1.8)            | 1.0 (0.6-1.6)            |
| 5-9.99 years                    | 4     | 206      | 0.8 (0.3-2.1)            | 0.7 (0.3-1.9)            |
| $\geq 10$ years                 | 3     | 66       | 1.8 (0.6-5.7)            | 1.7 (0.5-5.5)            |

1) Adjusted for age and gender (by design; risk-set matching).

2) Fully adjusted model, see section 'Main analysis'.

### Valproate

Association between exposure to valproate and risk of upper urinary tract cancer, specified by exposure pattern within the entire follow-up-period, excluding the last year prior to the index date

| Exposure group                  | Cases | Controls | Adjusted OR <sup>1</sup> | Adjusted OR <sup>2</sup> |
|---------------------------------|-------|----------|--------------------------|--------------------------|
| Non-use                         | 6,437 | 257,684  | 1.0 (ref.)               | 1.0 (ref.)               |
| Ever use                        | 40    | 1,396    | 1.1 (0.8-1.6)            | 1.1 (0.8-1.4)            |
| Long-term use ( $\geq 5$ years) | 6,428 | 257,467  | 0.8 (0.5-1.4)            | 0.9 (0.6-1.5)            |
| Duration of use:                |       |          |                          |                          |
| < 1 year                        | 24    | 883      | 1.1 (0.7-1.6)            | 1.0 (0.6-1.5)            |
| 1-4.99 years                    | 10    | 518      | 0.8 (0.4-1.4)            | 0.7 (0.4-1.3)            |
| 5-9.99 years                    | 4     | 199      | 0.8 (0.3-2.2)            | 0.8 (0.3-2.0)            |
| $\geq 10$ years                 | 2     | 85       | 0.9 (0.2-3.8)            | 0.9 (0.2-3.7)            |

1) Adjusted for age and gender (by design; risk-set matching).

2) Fully adjusted model, see section 'Main analysis'.
